# Supplementary material for: Design and Fabrication of α-MnO2-Nanorods-Modified Glassy-Carbon-Electrode-Based Serotonin Sensor
Source: MDPI journal article supplement (doi:10.3390/bios12100849), 2022-10-09
Supplement: s1 [file s1]

# Supporting Information

## Design and Fabrication of $\alpha$ -MnO<sub>2</sub>-Nanorods-Modified Glassy-Carbon-Electrode-Based Serotonin Sensor

Mohd Quasim Khan <sup>1,†</sup>, Rais Ahmad Khan <sup>2</sup>, Ali Alsalmeh <sup>2,\*</sup>, Khursheed Ahmad <sup>3,†</sup>  
and Haekyoung Kim <sup>3,\*</sup>

<sup>1</sup> Department of Chemistry, M.M.D. College, Moradabad, M.J.P. Rohilkhand University, Bareilly 244001, UP, India

<sup>2</sup> Department of Chemistry, College of Science, King Saud University, Riyadh 11451, Saudi Arabia

<sup>3</sup> School of Materials Science and Engineering, Yeungnam University, Gyeongsan 38541, Korea

\* Correspondence: aalsalmeh@ksu.edu.sa (A.A.); hkkim@ynu.ac.kr (H.K.)

† These authors contributed equally to this work.

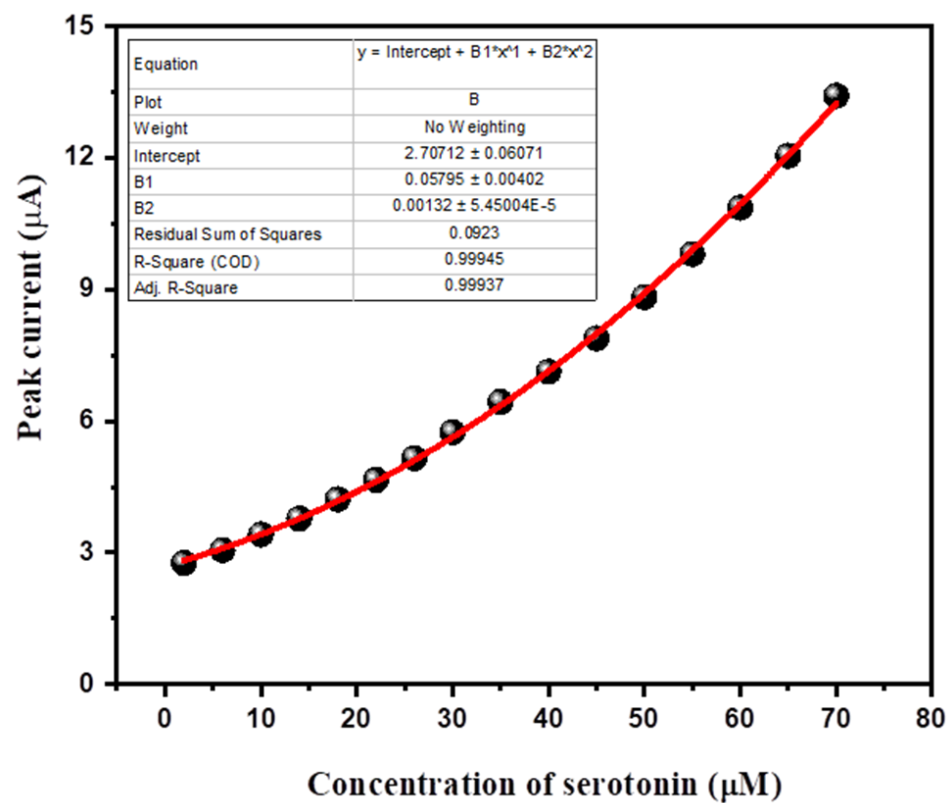

**Figure S1.** Calibration curve between current response versus concentration of serotonin.

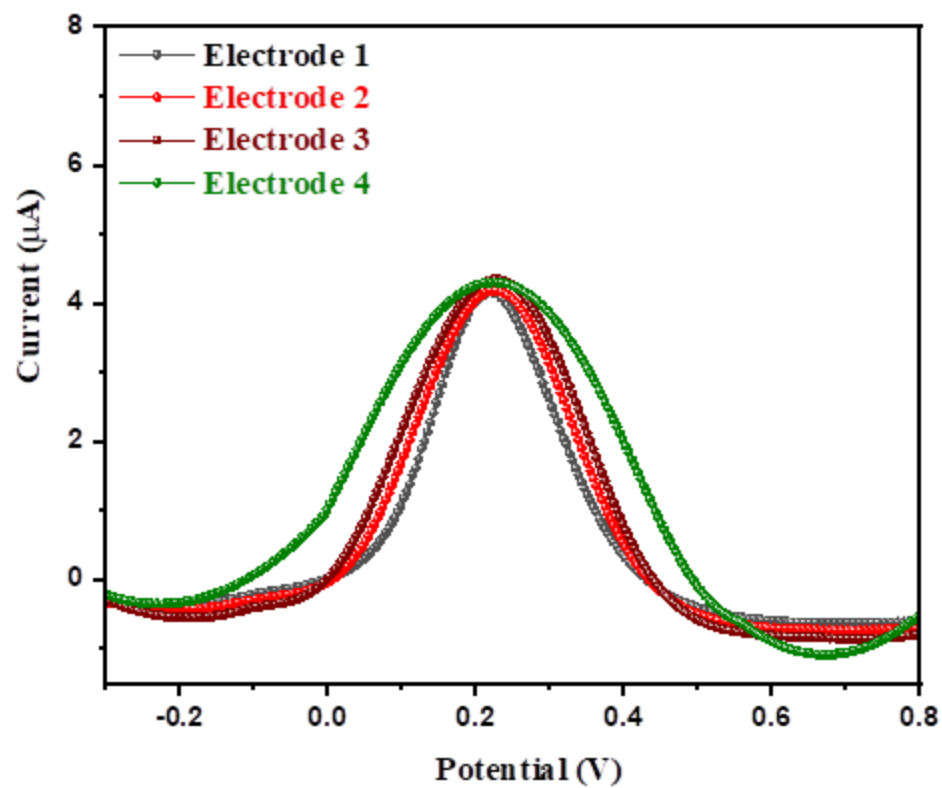

**Figure S2.** DPVs of four freshly fabricated MGCE in 20  $\mu\text{M}$  of serotonin in 0.1 M PBS (pH=7.0) at scan rate of 50 mV/s.

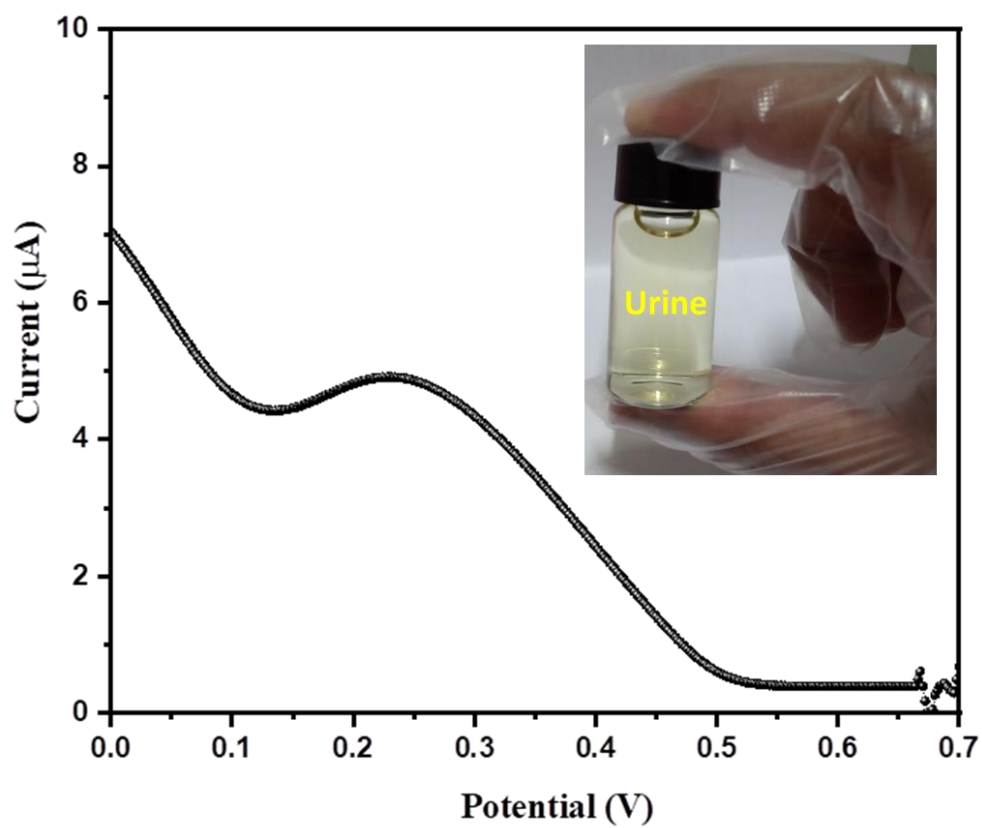

**Figure S3.** DPV of MGCE in 20  $\mu\text{M}$  of serotonin in urine at scan rate of 50 mV/s. Inset shows urine sample.

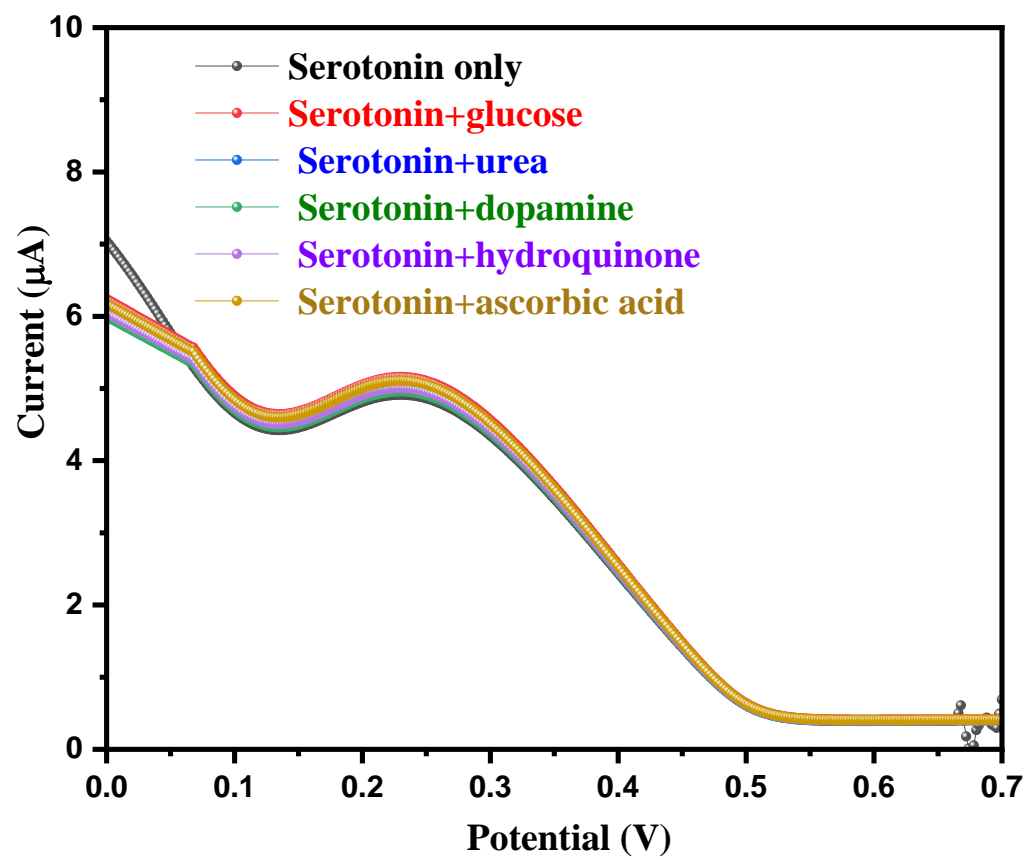

**Figure S4.** DPVs of MGCE in 20  $\mu$ M of serotonin with different interfering species in urine at scan rate of 50 mV/s.
